# Supplementary material for: Keep cool! Observed temperature variations at different process stages of the biobanking workflow – examples from the Leipzig medical biobank
Source: publisher site journal article supplement (doi:10.1515/labmed-2022-0167), 2023-03-24
Supplement: Supplementary file 1 [file j_labmed-2022-0167_suppl_002.docx]

**Supplementary Table 1:** Impact of events such as defrosting, repairing broken insulation, and cleaning filters on the mean and median temperature of selected freezers one month before and after the event.

|  |  | **1 month before event** | | | | **1 month after event** | | | | **after - before** | |
| --- | --- | --- | --- | --- | --- | --- | --- | --- | --- | --- | --- |
| **Event** | **UTF** | **mean** | **median** | **min** | **max** | **mean** | **median** | **min** | **max** | **mean** | **median** |
| defrosting | UTF-03 | -78,6 | -78,8 | -80,9 | -73,7 | -79,3 | -78,9 | -80,9 | -74,6 | -0,63 | -0,10 |
| UTF-04 | -79,8 | -79,7 | -80,7 | -78,8 | -79,7 | -79,6 | -81,0 | -77,6 | 0,06 | 0,10 |
| UTF-05 | -78,3 | -78,7 | -80,8 | -59,4 | -78,6 | -78,7 | -80,9 | -68,1 | -0,24 | 0,00 |
| UTF-06 | -79,1 | -78,9 | -80,9 | -76,8 | -79,3 | -79,0 | -80,6 | -77,6 | -0,23 | -0,10 |
| UTF-08 | -78,9 | -79,2 | -81,2 | -55,5 | -78,9 | -79,3 | -81,0 | -59,8 | 0,05 | -0,10 |
| repair | UTF-04 | -79,9 | -79,6 | -81,2 | -78,6 | -79,7 | -79,5 | -80,9 | -78,6 | 0,27 | 0,10 |
| UTF-05 | -78,5 | -78,9 | -80,9 | -59,7 | -78,9 | -78,9 | -80,8 | -65,2 | -0,45 | 0,00 |
| UTF-06 | -79,5 | -79,3 | -80,8 | -74,6 | -79,3 | -78,9 | -80,6 | -77,5 | 0,21 | 0,40 |
| UTF-08 | -79,7 | -79,7 | -80,9 | -70,1 | -79,6 | -79,5 | -80,9 | -71,3 | 0,13 | 0,20 |
| UTF-09 | -80,2 | -80,4 | -80,9 | -77,6 | -79,6 | -79,4 | -80,7 | -78,5 | 0,56 | 1,00 |
| cleaning | UTF-03 | -78,8 | -78,9 | -80,7 | -71,7 | -78,6 | -78,8 | -80,9 | -73,7 | 0,15 | 0,10 |
| UTF-04 | -79,8 | -79,7 | -80,7 | -78,9 | -79,8 | -79,7 | -80,7 | -78,8 | 0,03 | 0,00 |
| UTF-05 | -78,8 | -78,8 | -80,8 | -74,1 | -78,3 | -78,7 | -80,8 | -59,4 | 0,51 | 0,10 |
| UTF-06 | -79,1 | -78,9 | -80,7 | -77,0 | -79,1 | -78,9 | -80,8 | -61,6 | -0,02 | 0,00 |
| UTF-08 | -79,5 | -79,6 | -81,2 | -52,8 | -79,3 | -79,4 | -80,9 | -60,3 | 0,23 | 0,20 |

Negative values in the column after – before indicate colder temperatures after the event. Defrosting = defrosting of the freezer, repair = repair of broken insulation, cleaning = cleaning of filters, UTF = ultra low temperature freezer. Numbers of the UTFs are comparable to table 1
